# Supplementary material
Source: PubMed Central journal article supplement (PMC4449450)
Supplement: ajcr0005-1225-f3.pdf [file ajcr0005-1225-f3.pdf]

## Ki-67 in colorectal liver metastasis

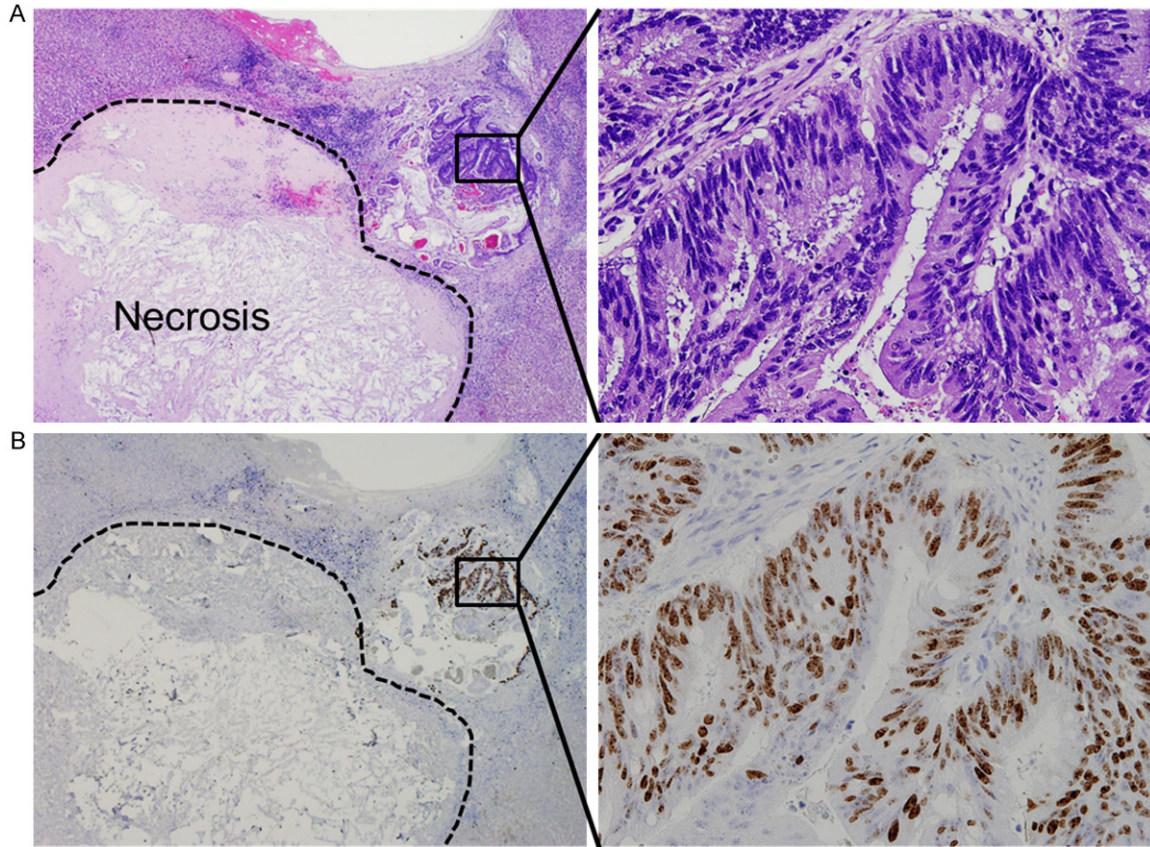

**Supplemental Figure 1.** Residual colorectal liver metastasis containing aggressive cancer cells even post-effective systemic chemotherapy. A. Hematoxylin-eosin staining. B. Ki-67 stainin. Area within dot line reveals necrotic change due to chemotherapy.

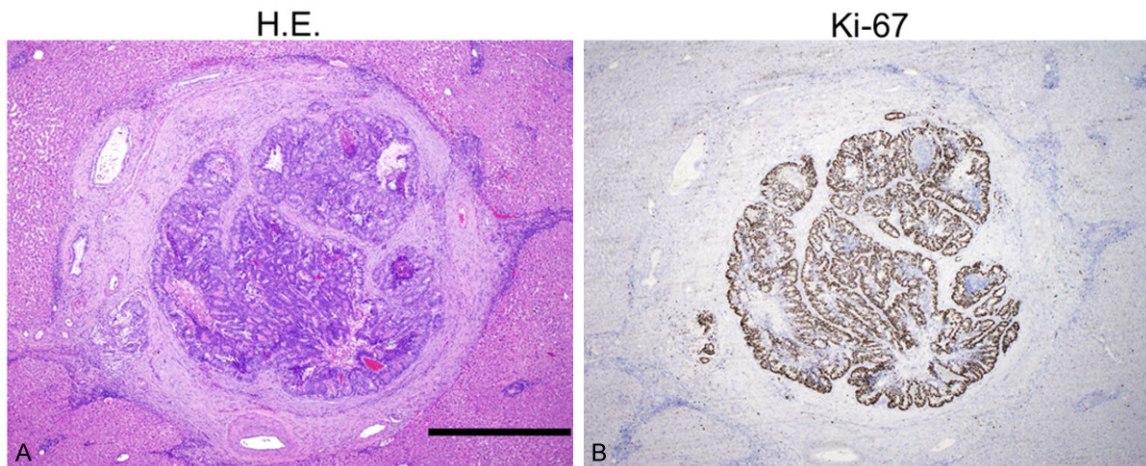

**Supplemental Figure 2.** Immunohistochemical staining of Ki-67 expression in the residual micro-metastasis after chemotherapy. A. Hematoxylin-eosin staining. B. High Ki-67 expression (Scale bar, 1 mm).

## Ki-67 in colorectal liver metastasis

**Supplemental Table 1.** Comparison of clinico-pathological factors between low and high Ki-67 expression in straight hepatectomy group (n = 42)

| Variables                            | Low Ki-67 (n = 14) | High Ki-67 (n = 28) | P-value |
|--------------------------------------|--------------------|---------------------|---------|
| Age                                  | 58 (34-71)         | 66 (25-85)          | 0.080   |
| Sex (male/female)                    | 8/6                | 21/7                | 0.238   |
| Synchronous/Metachronous             | 7/7                | 9/19                | 0.261   |
| Tumor size prior to hepatectomy (mm) | 22.5 (6-130)       | 32.5 (5-90)         | 0.198   |
| Tumor number prior to hepatectomy    | 1 (1-8)            | 2 (1-5)             | 0.535   |
| CEA prior to hepatectomy (ng/mL)     | 6.4 (1.0-167)      | 8.9 (0.5-2061)      | 0.390   |

Variable data was expressed with median (range). CEA, carcinoembryonic antigen.

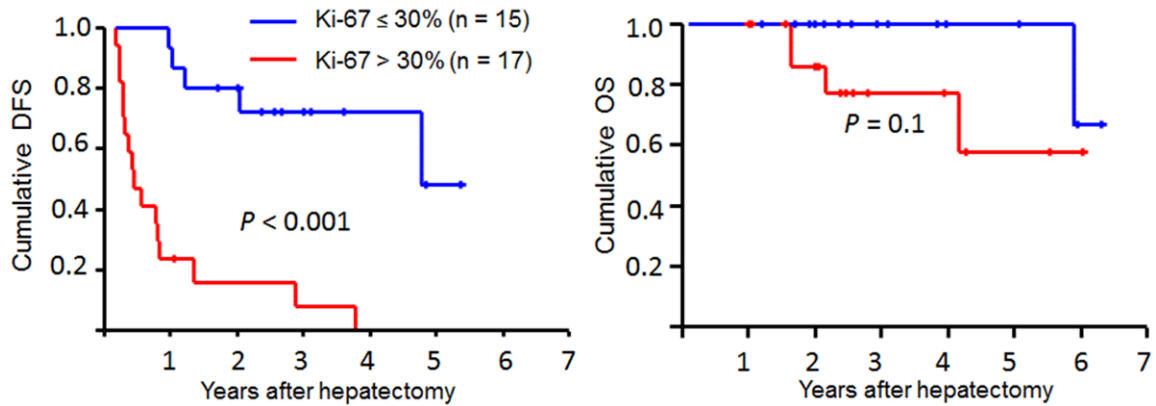

**Supplemental Figure 3.** A Kaplan-Meier survival analysis of disease-free survival (left panel) and overall survival (right panel) between high and low Ki-67 expression levels in patients with RECIST PR (n = 32). The log-rank test was used.
